# Supplementary figures and images for: mTORC-Driven Immunogenomic Reprogramming Shapes Prognosis and Therapeutic Vulnerabilities in Unfavorable Histology Wilms Tumor
Source: Research Square preprint supplement (doi:10.21203/rs.3.rs-8396890/v1), 2026-01-27

Supplementary Figure 1


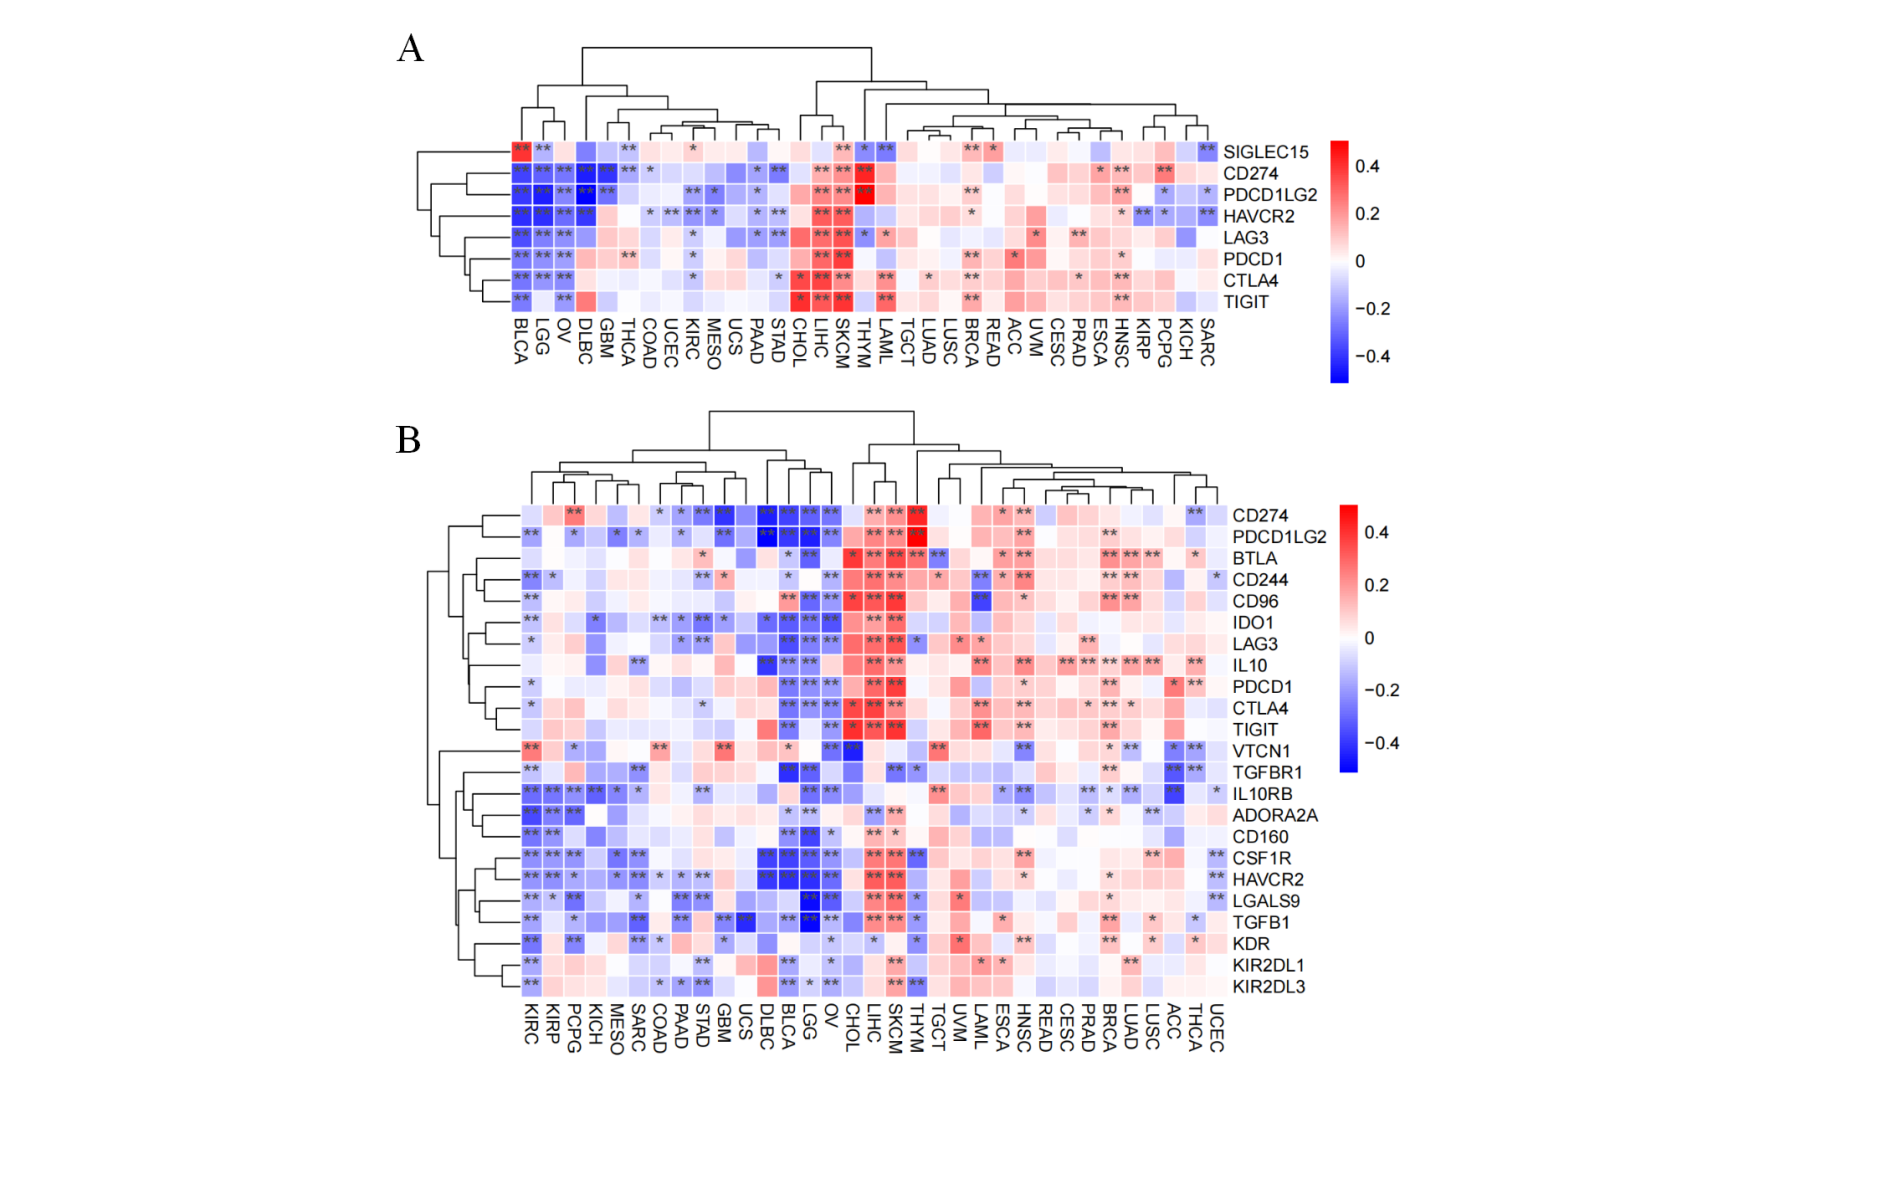


Supplementary Figure 2


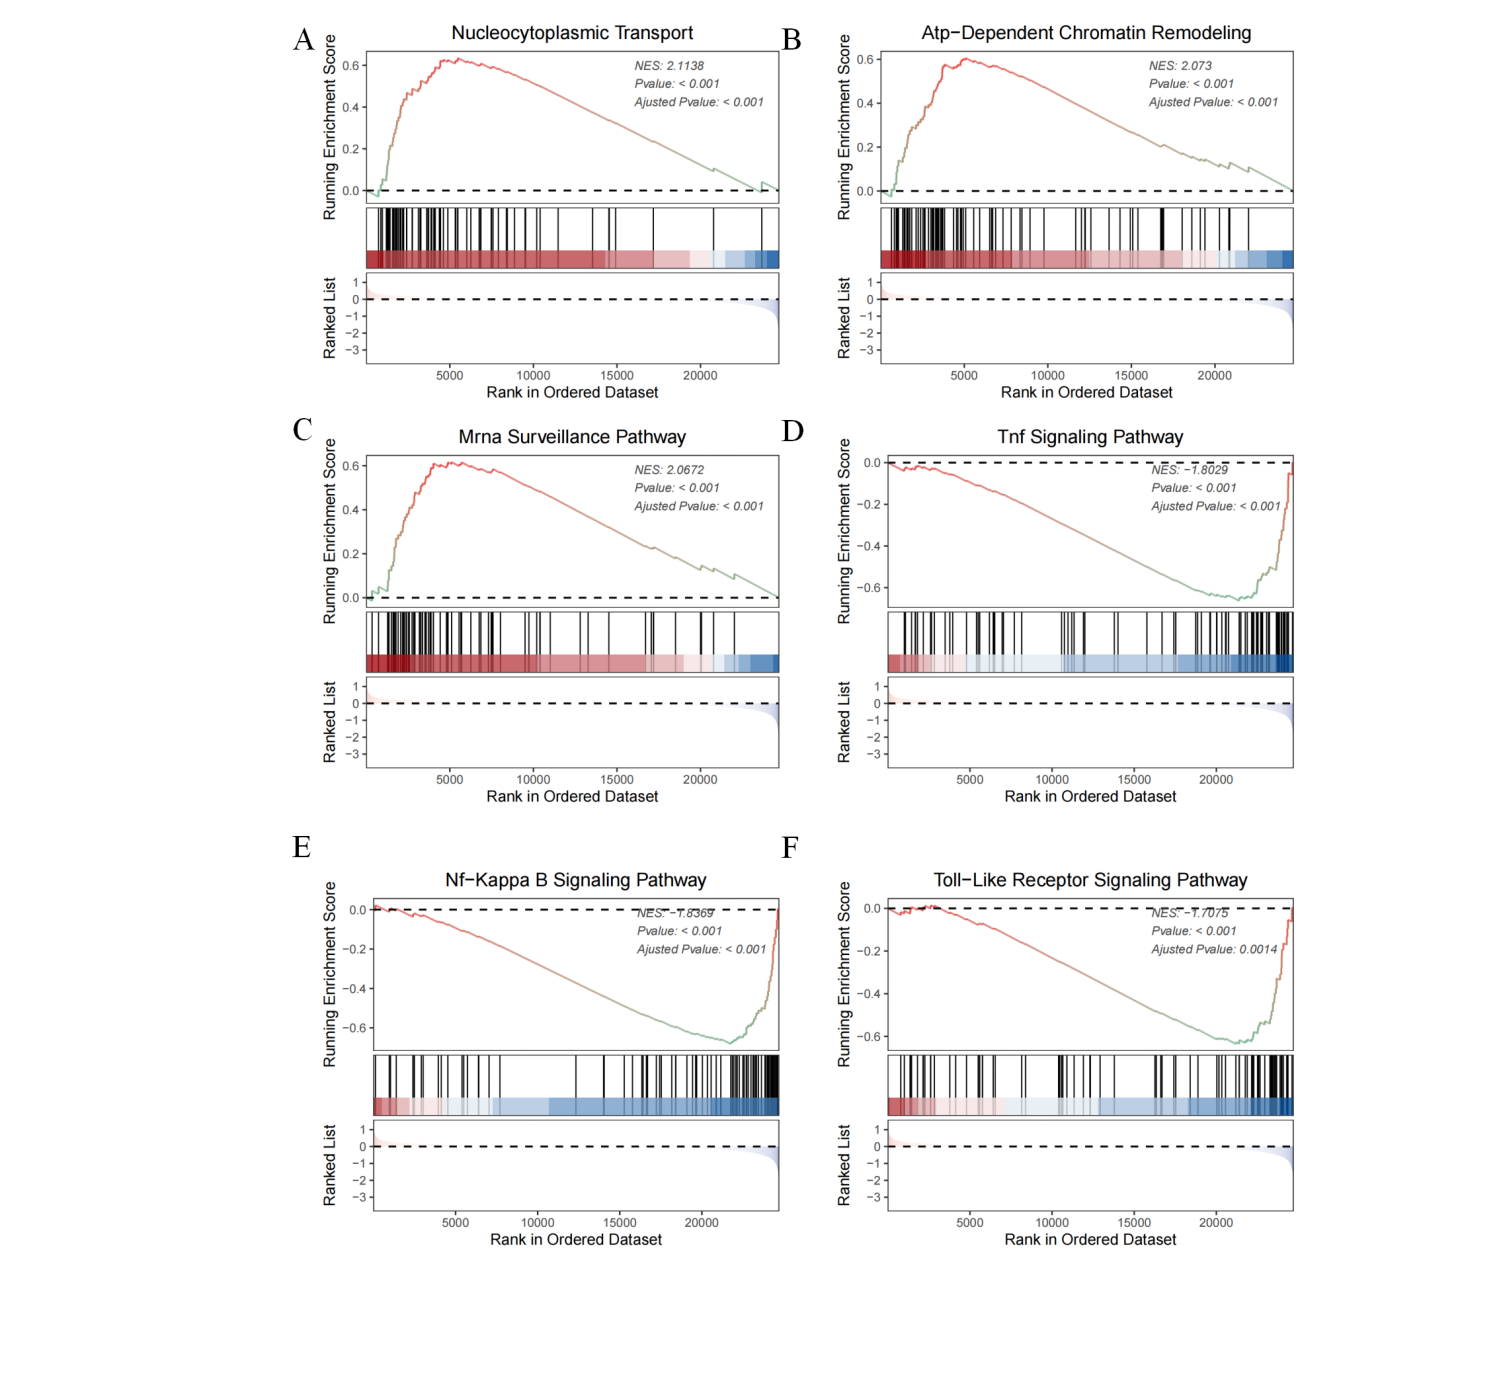


Supplementary Figure 3


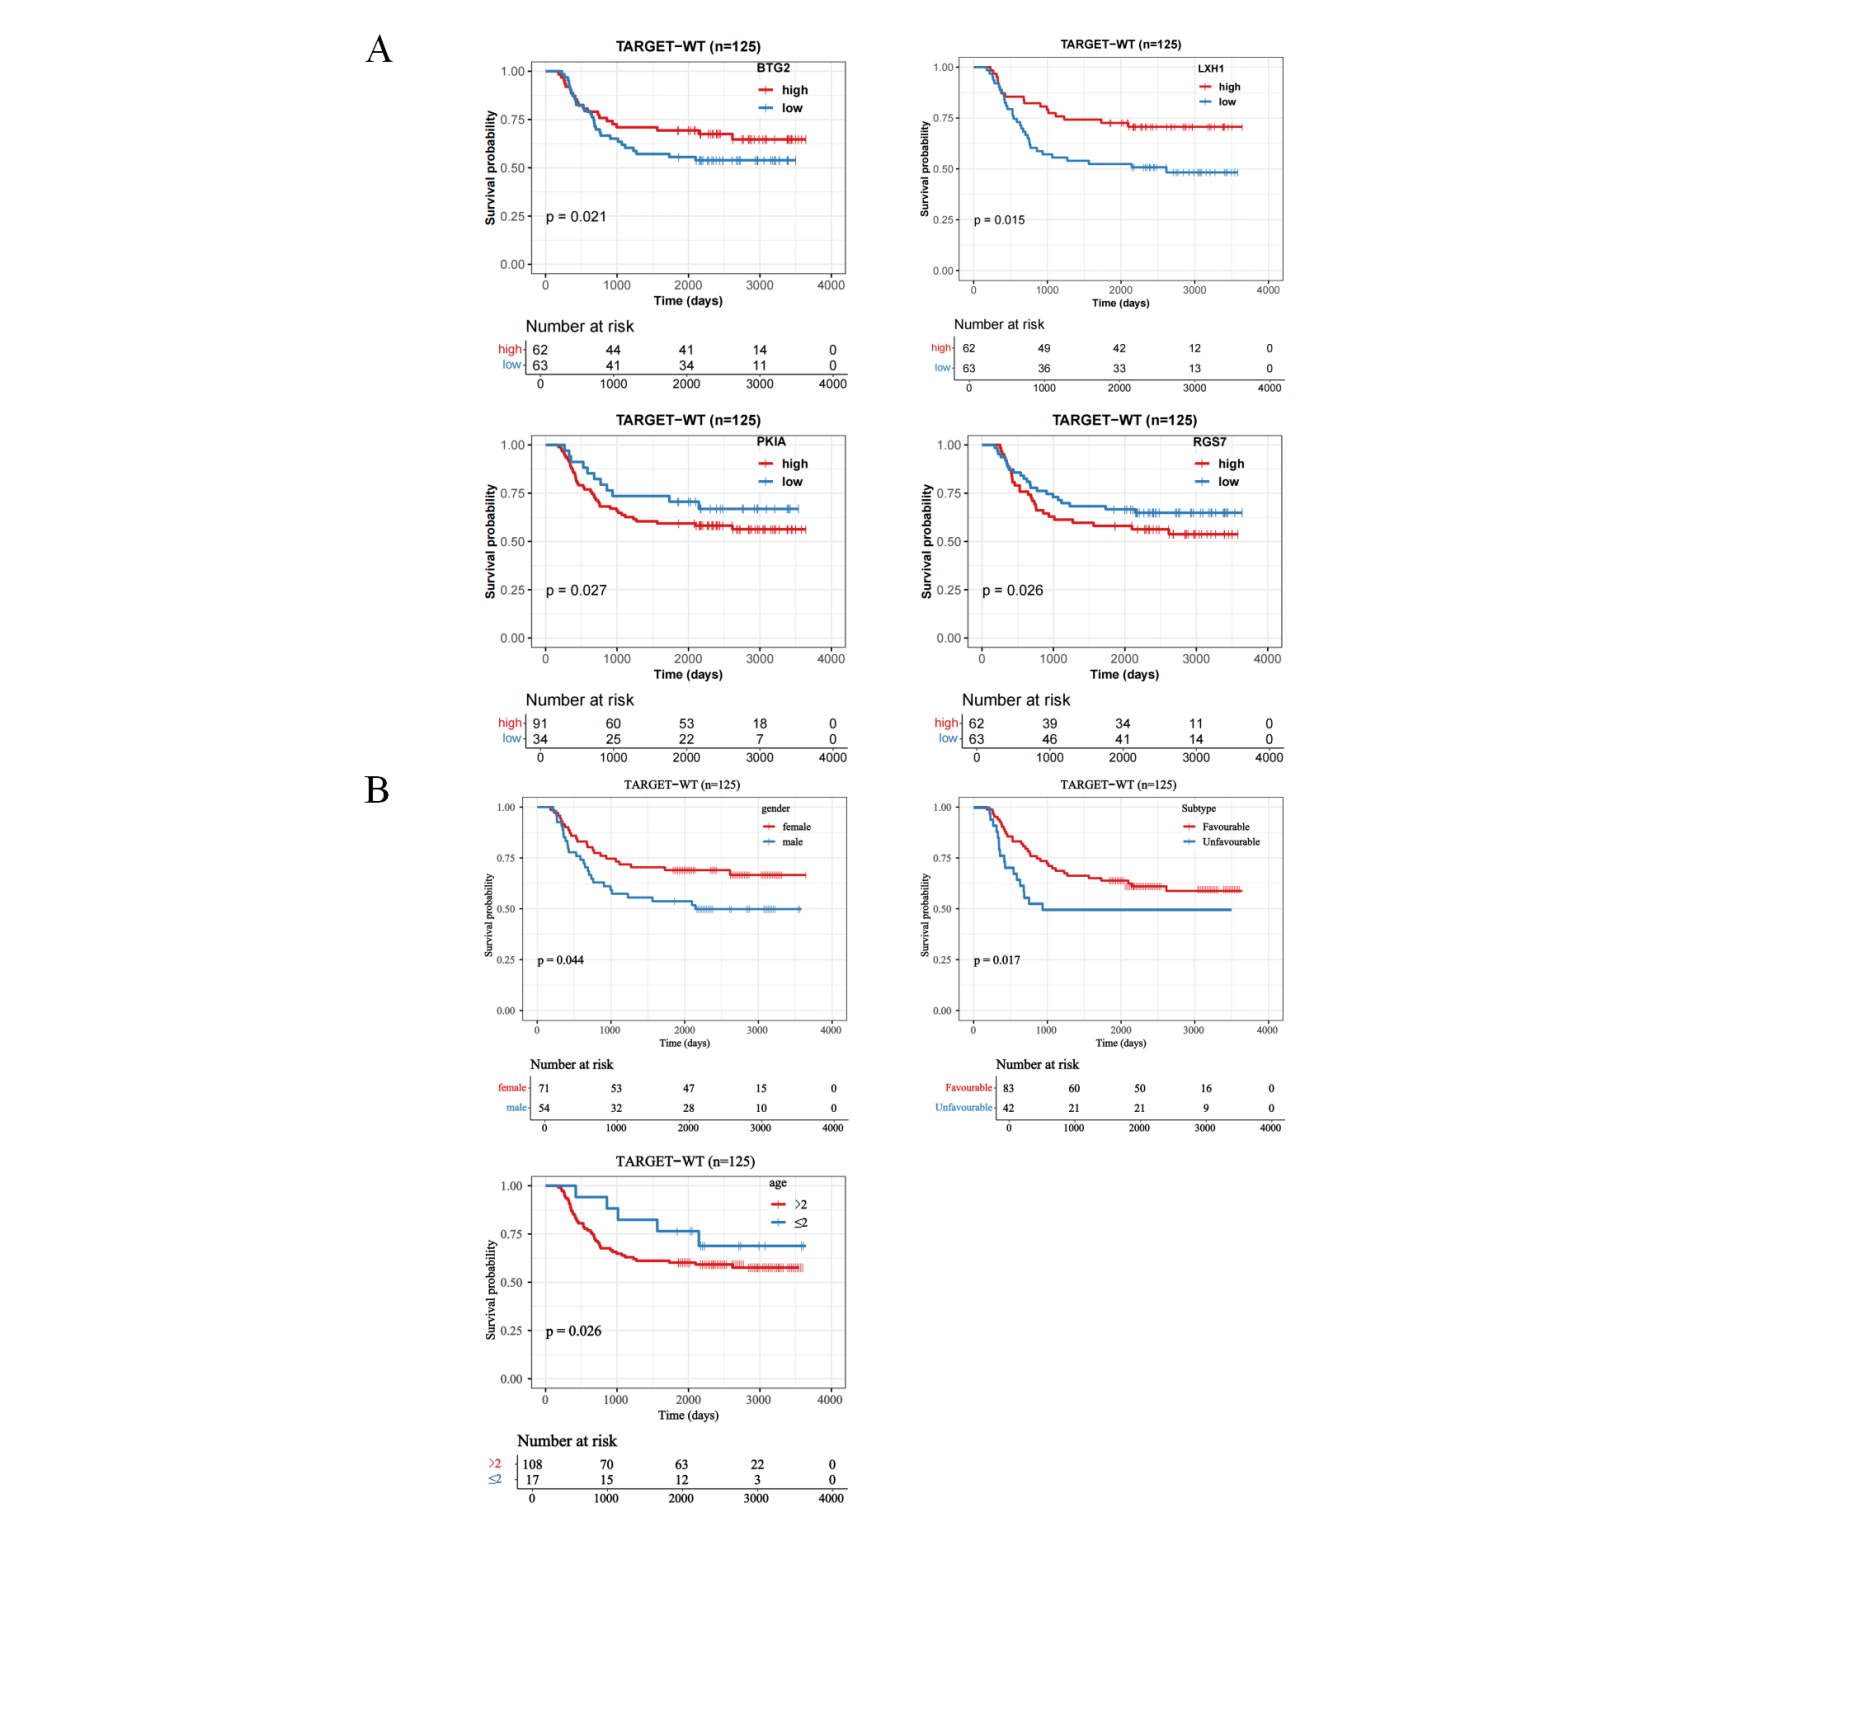

Supplement: Supplementary file 1 [file cb4268dfca037e820fee2930.docx]
